# Supplementary material for: 3q27.1 Microdeletion Causes a Clinically Recognizable Syndrome Characterized by Severe Prenatal and Postnatal Growth Restriction and Neurodevelopmental Abnormalities
Source: Research Square preprint supplement (doi:10.21203/rs.3.rs-853179/v1), 2021-09-02
Supplement: Supplementary file 1 [file bae39618caaf2d7d955004bf.xlsx]

## Sheet: Table-1
Table 1 Summary of clinical and genetic features of ten previously reported and present cases with 3q26-3q28 microdeletions
Reference	Mandrile et al., 2013 [7]	Mandrile et al., 2013 [7]	Mandrile et al., 2013 [7]	Zarate et al., 2013 [8]	Dasouki et al., 2014 [9]	Sahin et al., 2014 [10]	Bouman et al., 2015 [11]	Ounap et al., 2016 [12]	This study	This study	Consensus
Patient	Individual: 1	Individual: 2	Individual: 3	Individual: 4	Individual: 5	Individual: 6	Individual: 7	Individual: 8	Proband-1	Proband-2
Chromosomal regions (hg19)	3q26.33-3q27.2 (3:181648378-185786898)	3q26.33-3q27.2 (3:181692255-185969168)	3q27.1-3q27.2 (3:183047473-185140522)	3q26.33-3q27.5 (3:182189525-187212935)	3q26.33-3q27.1 (3:182470516-184469308)	3q26.33-3q27.3 (3:182507317-186845923)	3q26.33-3q27.3 (3:183220510-189409266)	3q26.33-3q28: (3:182674821–191025402)	3q27.1-3q28 (3:183011106-187947036)	3q27.1-3q27.2: (3:182950371-185324970)	Smallest Region of Overlap 3q27.1 chr3:183220510-184469308
Size of deletion	4.14 Mb	4.28 Mb	2.09 Mb	5 Mb	2 Mb	4.3 Mb	6.18 Mb	8.35-Mb	4.93Mb	2.37 Mb	1.2 Mb
Investigation Method	Array-CGH; FISH	Array-CGH; G-banded karyotype	Array-CGH; FISH	SNP array	Chromosomal Microarray Analysis (CMA); FISH	Array-CGH; Karyotype; FISH	Array-CGH; Karyotype; FISH	SNP array; Karyotype	SNP array; FISH	SNP array; FISH; G-banded karyotype	Various
Sex	M	M	F	F	M (47,XXY)	F	F	F	M	F	4 Male and 6 Female
Inheritance	de novo	de novo	Not from mother, father is not available	Unknown	de novo	Unknown	de novo	Unknown	de novo	Not from mother, father is not available	5 De novo, 5 unknown
Age at last examination/ Family Descent	6years; European descent	18 years; European descent	12years; European descent	16 years; Unknown	9½ years; Caucasian	7 years;Turkish	fetus of 22+1 weeks (POC)/ Unknown	16years; Estonian	6 years; Belizean/ Hondurian and Nicaraguian	15months; Dominican	Age range: Fetus of 22+1 weeks-18 years
Family History	non-consanguineous parents;unremarkable	non-consanguineous parents;unremarkable	non-consanguineous parents;unremarkable	unremarkable	Twin sister had dyslexia and hypotonia but normal growth, and another older sister with failure to thrive, chronic diarrhea. He had another healthy older brother. His 33 years old mother reported history of asthma and alopecia.	nonconsanguineous; unknown	Mother had medical history of depressive and an obsessive disorder. Pregnancy was achieved by an intracytoplasmic sperm injection.	noncansangineous;unremarkable	noncansangineous; paternal half brother with pervasive developmental disorder, non-verbal and autism (no genetic test perfomed); maternal first cousin with autism and distant cousin has hole in heart	non-consanguineous parents;unremarkable	Unremakable/Various
Oligohydramnios	(-)	(-)	(-) chronic polyhydramnios	(-)	(-)	(+)	(-)	(-)	(+) placentomegaly	(+)	3 of 10
Intrauterine growth restriction	(+)	(+)	(+)	(+)	(+)	(+)	(+)	(+)	(+) fetal weight less than the 10th percentile for this gestational age	(+)	10 of 10
Short stature	(+) 98 cm (-3.68 SD)	(+) 147.6 cm (-4 SD)	(+) 136.2 cm (-2 SD)	(+) 154 cm (9th centile, -1.35 SD)	(+) 119.4 cm (<<3rd centile)	(+)	N/A	(+) 157 cm ( -1.5 SD)	(+) at 3 months : 54.5 cm (<3%) at 61/2 years: 101.5 cm	(+)	9 of 9
Feeding problems	(+)	(+)	(+)	(+)	(-)	(-)	N/A	(+)	(+) in neonatal period with desaturations	(+)	7 of 9
Microcephaly	(+) OCF: 46 cm (-4.44 SD)	Unknown OCF:29.5 cm ( -3.16 SD) (at birth )	(-) OCF: 51.2 cm ( -1.15 SD)	(+) 48 cm (<<3rd centile, -5.93SD)	(+) 50.2 cm	(+) 46 cm (below the third centile)	(+)	(+) OFC 52 cm (- 2 SD)	(+) and Dolicocephalic	(+)	8 of 10
Frontal bossing	(-)	(-)	(+)	(-)	(-)	(-)	(-)	(-)	(+) slight frontal bossing	(-)	2 of 10
Flat/dysmoprhic facial features	(+)	(+) micrognathia and short philtrum	(+) mildly flat and short philtrum and mild retrognathia	(+) short philtrum	(+) thin philthrum	(+) dysmorphic features; thin lips	(+) micrognathia;retrognathia	(+) smooth philtrum, narrow mouth	(+) micrognathia, narrow, high arched palate	(+) Arched palate; Retrognathia	10 of 10
Medially sparse eyebrows	(+)	(+)	(+)	(+)	(+)	(-)	(-)	(+)	(-)	(-)	6 of 10
Short palpebral fissures /Blepharophimosis	(-)	(-)	(+) mildly narrow horizontal openings with normal slant	(+) short palpebral fissures	puffy eyelids	periorbital fullness	downslanted palpebral fissures	(+) blepharophimosis, ptosis	(-)	(-)	6 of 10
Broad or flat or prominent nasal bridge and tip	(+)	(+) prominent	(+)	(+)	(-)	Broad base to nose	broad nasal bridge	(+) depressed nasal tip	(+) Absent nasal bone (prenatally); flat nasal bridge (postnatally)	(+) flat	9 of 10
Epicanthal folds	(+)	(+)	(+)	(-)	(-)	(+)	N/A	(+)	(+) small bilateral epicanthal fold	(+)	7 of 9
Eyes	Myopia/astigmatism; normal fundus oculi	Bilateral keratoconus	Myopia/astigmatism	(-)	(-)	(-)	(-)	Hyperopia	hypotelorism	subjective hypertelorism	6 of 10
Ears	Preauricular pit	(-)	Mildly simple and thickened	(+) short ears	(-)	Low-set ears	flattened helix, prominent antihelix	Low-set dysplastic	ear rotated posteriorly, floppy	(-)	7 of 10
Hearing	Auditory Brainstem Response results: uncertain	conductive hearing loss	intermittent decreased hearing secondary to fluid.	severe sensorineural hearing loss	(-)	(-)	N/A	sensorineural hearing loss	(-)	(-)	5 of 9
Teeth	Incomplete dentition (upper jaw more compromised), Teeth eruptoin markedly delayed	Slow to erupt. At 15 years still had primary dentition, despite his adult teeth erupting.	Primary teeth loss was delayed. Teeth were small, pointed, and crowded; fused lower incisors	poor dentition with delayed permanent teeth eruption, prominent upper incisors and maxilla.	dental crowding and delayed permanent teeth eruption	(-)	N/A	Prognathism; Peg-like, irregular and with dysplastic enamel	crowded	N/A	7 of 8
Skeletal in general	kyphosis and pectus carenatum (mild); joint laxity	(-)	Hypermobility of the hips	(-)	(-)	(-)	(-)	Thoracal kyphosis	(-)	(-)	3 of 10
Hands abnormalities	(-)	(-)	Mildly tapered fingers/flattening of the ulnar border	aged appearance of the hands	(-)	(-)	short limbs	(-)	Mild elbow restriction (bilateral); Thumbs are finger like. Left hand simian crease.	(-)	4 of 10
Clinodactyly	(+) Clinodactyly IV digit (toes)	(-)	(-)	(+) 5th finger clinodactyly	(-)	(-)	(+) bilateral clinodactyly of the fifth finger	(+) 5th finger clinodactyly	(+) 5 toe clinodactyly	(+) 5 toe clinodactyly	6 of 10
Feet abnormalities	Pes planus; third toes overlap with fourth toes (also reported in father)	Pes planus; abnormal foot position	Mild pes planus	overlapping toes; pes planus	(-)	(-)	Bilateral club feet	Mild left Club foot	Flat and long feet with long fingers and toes. Mild metatarsus varus	1st and 2nd toe gap	8 of 10
Neuro Test	Brain ultrasound scan, (EEG): Normal.	EEG showed no background seizure activity, cranial ultrasound was unremarkable apart from a small cyst adjacent to the choroid plexus.	Brain MRI showed a 12mm Chiari malformation, crowding of the foramen magnum, narrowing of the inferior fourth ventricle, limited flow of cerebrospinal fluid through the foramen magnum causing ventriculomegaly involving the third and lateral ventricles.	MRI: Normal EEG at age 15 showed moderately low amplitude in all areas with generalized low voltage.	Unknown	MRI: hypoplasia of corpus callosum and cerebral atrophy	N/A	Brain MRI showed brain atrophy in frontal lobe.	1st EEG abnormal 2nd EEG normal	Unremarkable head ultrasound	Various
Cognitive abnormalities	Intellectual disability; Developmental delay; Speech delay	Intellectual disability; Developmental delay; Speech delay	Learning disability, borderline IQ; Developmental delay	Developmental delay; speech was somewhat understandable but with coarse voice	Developmental delay ; Speech delay	Intellectual disability; Developmental delay; ; Speech delay	N/A	Mild Intellectual disability; Developmental delay; Dysarthric	cognitive delay; Developmental delay; Poor articulation, speak in short phrases	Motor delays/Failure to thrive	9 of 9
Behavioral abnormalities	(-)	(+)	(+) Attention deficit disorder (ADHD) and an extremely friendly personality.	(-)	(+) Asperger syndrome	(-)	N/A	Clumsy; Tics of eyelids and nail biting	used to engage in self-injurious behavior, but no longer does.	(-)	5 of 10
Seizure/Epilepsy	(-)	(+) Tonic seizure at birth three hours afte birth . He had several more seizures over the first 24 hrs of life	No seizure, but does stare for several minutes at a time	(+) At age 15 she was diagnosed with tonic-clonic and myoclonic photo-convulsive seizures	(-)	(-)	N/A	(-)	(-)	(-)	2 of 9
Hypotonia	(+)	(+)	(+)	(+) progressed to mild generalized hypertonia by 16 years of age	(+)	(-)	N/A	(+)	(-)	(-)	6 of 9
Heart anomaly	(+) Patent ductus arteriosus	(-)	(-)	(-)	(-)	(+) patent foramen ovale	(+) Atrial septal defect and a slightly narrowed aortic arch	(+) Supravalvular aortic and pulmonary stenosis	(-)	(-)	4 of 10
Genital/Urinary	(+) Vesicoureteric reflux; Retractable right testicle	(+) Undescended testes Micropenis/cryptorchidism	(+) Hypoplastic labia minora and pubic pad. Possible problem with the kidneys.	(-)	(-)	(-)	(+) Clitoromegaly (prominent clitoris);	(-)	(+) Mild right renal pelviectasis	(-)	5 of 10
Thrombocytopenia	(+) Reduced platelet concentration low	(-)	(+) Platelet concentration at low end of normal	(-)	(+) Thrombocytopenia	(-)	(-)	(-)	(-)	(-)	3 of 10
Additional findings	Thin skin with very little subcutaneous fat. Recurrent upper airway infections; Bladder diverticula; Inguinal hernia	Recurrent otitis media; Needed resusciation at birth for poor respiratory effort.	Recurrent otitis media; Gastroesophageal reflux. Multiple freckles of the left forearm and café au lait spot of left lower flank. Acanthosis nigricans	severe gastroesophageal reflux; thin skin with decreased subcutaneous fat.	Neonatal respiratory distress; recurrent infections; tremors, easy bruising	Diaphragm evantration; irregular respiration and tachypne; mild pulmonary hypertension; segmental perfusion defects bilaterally	abnormally shaped skull (slightly trigonocephalic and a lemon sign),	Delayed puberty; Increased muscle tonus (legs more than arms) and increased deep tendon reflexes	Increased muscle tone, coarse hairs, sleeping irregular.		Various
